# Supplementary material for: Synthesis and binding studies of novel di-substituted phenanthroline compounds with genomic promoter and human telomeric DNA G-quadruplexes
Source: Royal Society of Chemistry journal article supplement (doi:10.1039/c3ob27426h), 2013-01-01
Supplement: c3ob27426h.pdf [file c3ob27426h.pdf]

# Synthesis and binding studies of novel di-substituted phenanthroline compounds with genomic promoter and human telomeric DNA G-quadruplexes

Chunying Wei,\* Yanbo Wang, Meiyang Zhang

*Key Laboratory of Chemical Biology and Molecular Engineering of Ministry of Education, Institute of Molecular Science, Shanxi University, Taiyuan, 030006, China.*

*Fax: (+) 86-351-7018429; Tel: (+) 86-351-7010699; E-mail: [weichuny@sxu.edu.cn](mailto:weichuny@sxu.edu.cn)*

## Electronic Supplementary Information (ESI)

**Fig.S1** Percent TO displacement from *c-kit2* and *c-myc* G-quadruplexes and ds26 against increasing concentrations of compounds from 0.125 to 27.0  $\mu\text{M}$  in buffer containing 100 mM KCl.

**Fig.S2** CD titration spectra of *c-kit2* (A) and *c-myc* (B) G-quadruplexes with the increasing amount of **4b** (arrows: 0-3 mol equiv) in Tris-HCl buffer containing 100 mM KCl at pH 7.4.

**Fig.S3** CD titration spectra of *c-kit2* (A) and *c-myc* (B) G-quadruplexes with the increasing amount of **4b** (arrows: 0-3 mol equiv) in Tris-HCl buffer no addition of KCl at pH 7.4.

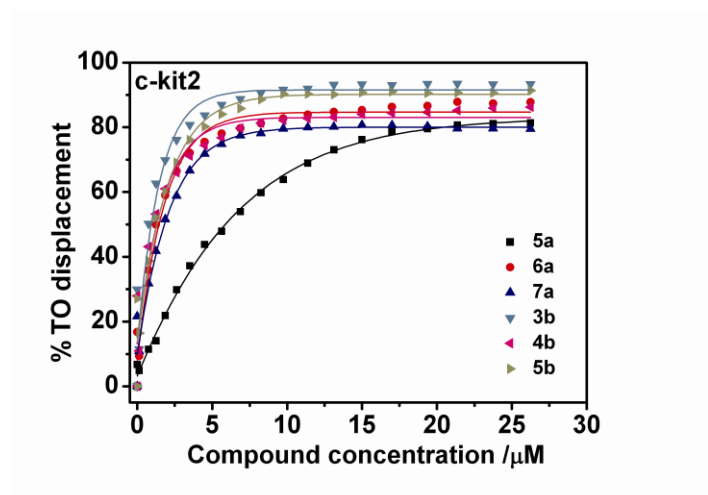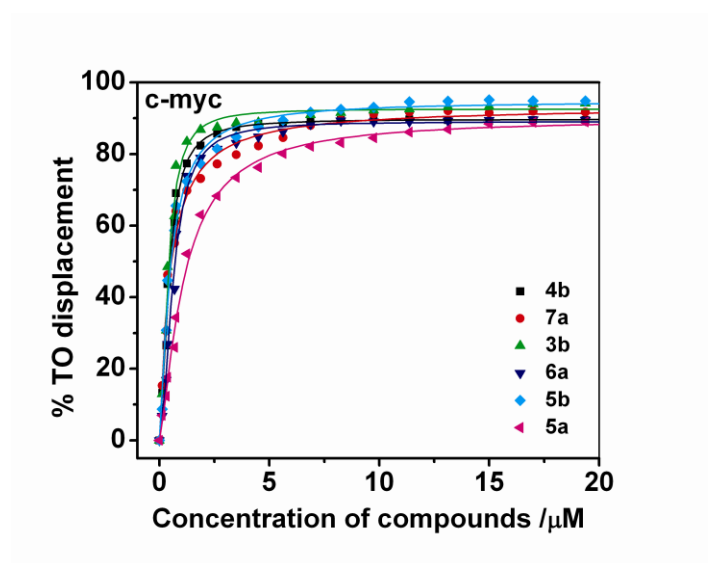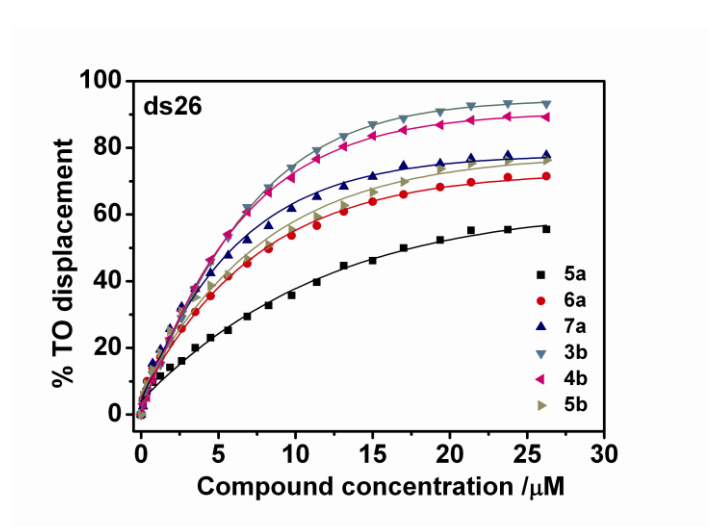

Fig.S1

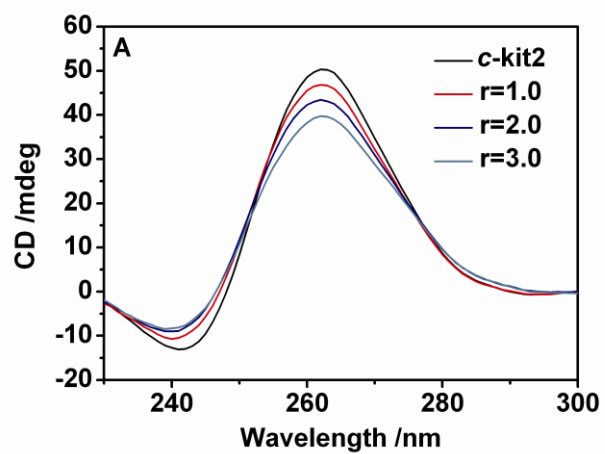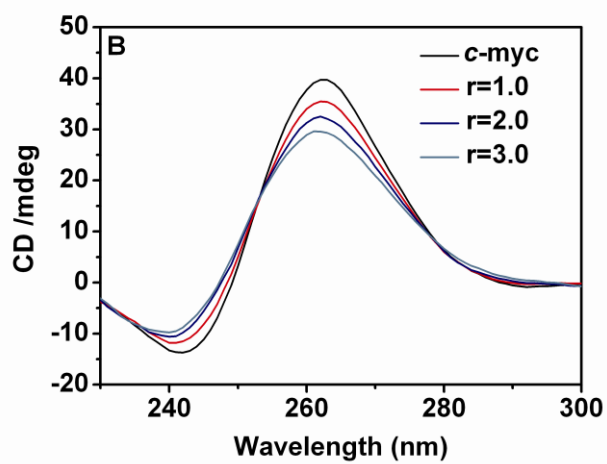

Fig. S2

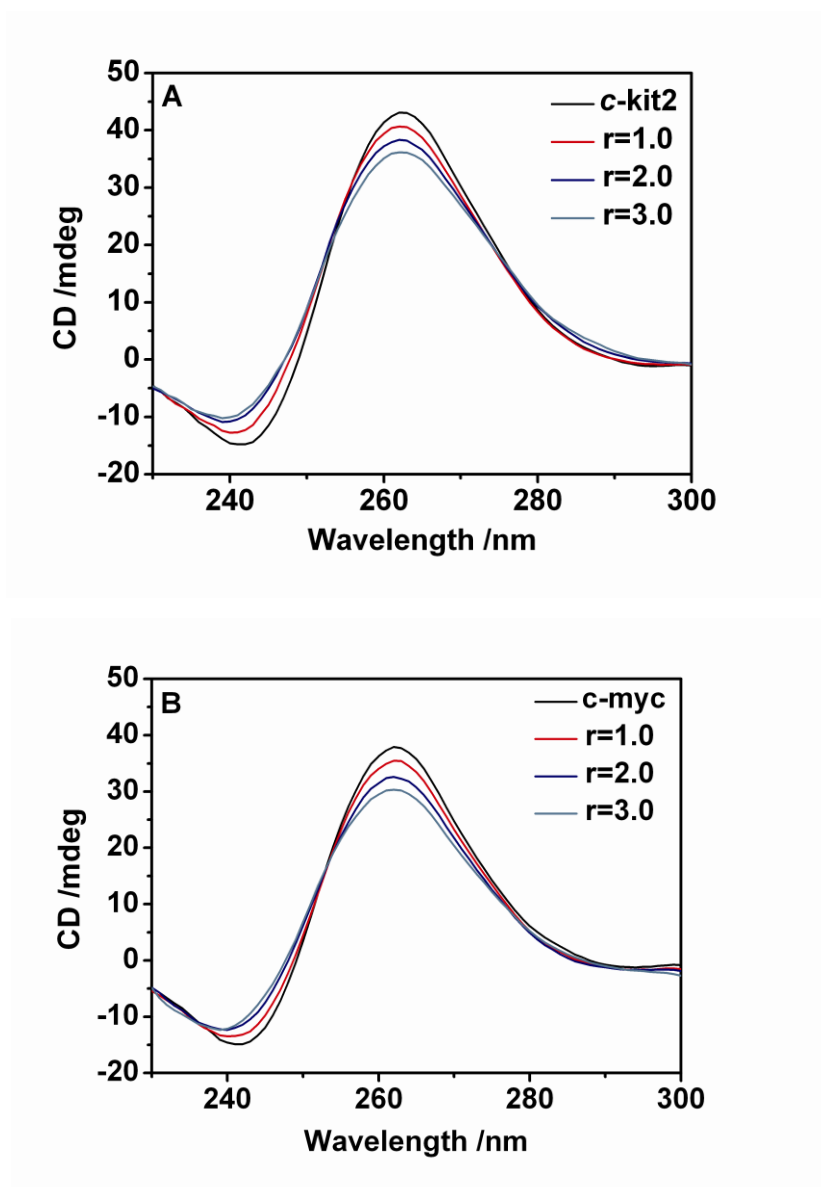

Fig. S3
